# Supplementary material for: Carbon Foam-Reinforced Polyimide-Based Carbon Aerogel Composites Prepared via Co-Carbonization as Insulation Material
Source: MDPI journal article supplement (doi:10.3390/gels8050308), 2022-05-16
Supplement: s1 [file s1]

## Article

# Carbon Foam-Reinforced Polyimide-Based Carbon Aerogel Composites Prepared via Co-Carbonization as Insulation Material

Zixuan Zheng, Guojie Liang \*, Li Li, Jing Liu, Xinbo Wang, Yi Sun and Kai Li \*

State Key Laboratory of NBC Protection for Civilian, Research Institute of Chemical Defense, 35 Huayuan North Road, Haidian District, 100083 Beijing, China; zzx19972022@163.com (Z.Z.); lily97@buaa.edu.cn (L.L.); liuj200721296@sina.com (J.L.); wxb1993@mail.ustc.edu.cn (X.W.); 13501260901@139.com (Y.S.)

\* Correspondence: lianguojie@126.com (G.L.); 750455@sohu.com (K.L.)

## Supplementary Material

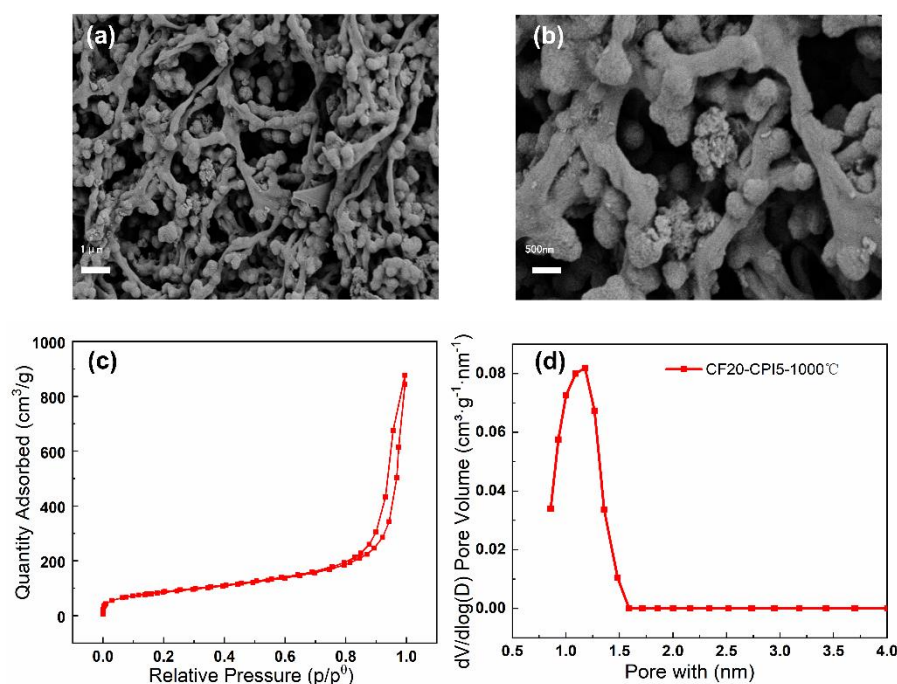

**Figure S1.** (a,b) SEM images of the morphology of PI, (c) N<sub>2</sub> adsorption-desorption isotherms, (d) BJH desorption dV/dlog(D) pore volume of CPI.

**Table S1.** The density of polyimide aerogels, pre-carbonized foams and composite samples before and after carbonization.

| Sample  | Q <sub>before carbonization</sub><br>(g·cm <sup>-3</sup> ) | Q <sub>800°C</sub><br>(g·cm <sup>-3</sup> ) | Q <sub>900°C</sub><br>(g·cm <sup>-3</sup> ) | Q <sub>1000°C</sub><br>(g·cm <sup>-3</sup> ) |
|---------|------------------------------------------------------------|---------------------------------------------|---------------------------------------------|----------------------------------------------|
| CF20-PI | 0.118                                                      | 0.115                                       | 0.105                                       | 0.112                                        |
| CF30-PI | 0.124                                                      | 0.116                                       | 0.110                                       | 0.094                                        |
| CF40-PI | 0.129                                                      | 0.121                                       | 0.118                                       | 0.107                                        |
| CF50-PI | 0.151                                                      | 0.124                                       | 0.117                                       | 0.094                                        |
| CF20    | 0.037                                                      | 0.068                                       | 0.054                                       | 0.041                                        |
| CF30    | 0.042                                                      | 0.039                                       | 0.042                                       | 0.045                                        |

|      |       |       |       |       |
|------|-------|-------|-------|-------|
| CF40 | 0.045 | 0.054 | 0.056 | 0.057 |
| CF50 | 0.071 | 0.071 | 0.078 | 0.065 |
| PI   | 0.186 | 0.247 | 0.255 | 0.221 |

**Table S2.** Textual properties of phenolic resin-based carbon previous research.

| Sample | $S_{\text{BET}}$<br>( $\text{m}^2/\text{g}$ ) | $V_{\text{to-tal}}$ ( $\text{cm}^3/\text{g}$ ) | $V_{\text{mic}}$ ( $\text{cm}^3/\text{g}$ ) | $D_{\text{pore}}$<br>(nm) | Microporos-<br>ity(%) | Reference |
|--------|-----------------------------------------------|------------------------------------------------|---------------------------------------------|---------------------------|-----------------------|-----------|
| A-900  | 611.7                                         | 0.72                                           | 0.25                                        | 4.73                      | 34.6                  | 33        |

**Table S3.** Specific heat and thermal diffusion coefficient of CF-CPI and CF at different temperatures.

| Temp.<br>/°C | $C_p$<br>( $\text{J}\cdot(\text{g}\cdot\text{K})^{-1}$ ) | $\alpha_{\text{CF20-CPI}}$<br>-1000°C<br>( $\text{mm}^2\cdot\text{K}^{-1}$ ) | $\alpha_{\text{CF30-CPI}}$<br>-1000°C<br>( $\text{mm}^2\cdot\text{K}^{-1}$ ) | $\alpha_{\text{CF40-CPI}}$<br>-1000°C<br>( $\text{mm}^2\cdot\text{K}^{-1}$ ) | $\alpha_{\text{CF50-CPI}}$<br>-1000°C<br>( $\text{mm}^2\cdot\text{K}^{-1}$ ) | $\alpha_{\text{CF20}}$<br>-1000°C<br>( $\text{mm}^2\cdot\text{K}^{-1}$ ) |
|--------------|----------------------------------------------------------|------------------------------------------------------------------------------|------------------------------------------------------------------------------|------------------------------------------------------------------------------|------------------------------------------------------------------------------|--------------------------------------------------------------------------|
| 25           | 0.71                                                     | 0.69±0.01                                                                    | 0.74±0.02                                                                    | 0.76±0.01                                                                    | 0.65±0.01                                                                    | 0.8±0.01                                                                 |
| 100          | 0.91                                                     | 0.75±0.02                                                                    | 0.78±0.01                                                                    | 0.78±0.02                                                                    | 0.67±0.01                                                                    | 1.08±0.01                                                                |
| 300          | 1.33                                                     | 0.76±0.01                                                                    | 0.79±0.02                                                                    | 0.81±0.01                                                                    | 0.72±0.01                                                                    | 1.37±0.02                                                                |
| 500          | 1.56                                                     | 0.69±0.01                                                                    | 0.8±0.01                                                                     | 0.88±0.01                                                                    | 0.79±0.02                                                                    | 1.73±0.01                                                                |
| 700          | 1.76                                                     | 0.71±0.02                                                                    | 0.87±0.01                                                                    | 1.01±0.01                                                                    | 0.91±0.01                                                                    | 2.03±0.01                                                                |
| 900          | 1.87                                                     | 0.83±0.01                                                                    | 0.88±0.02                                                                    | 1.23±0.02                                                                    | 1.08±0.01                                                                    | 3.05±0.02                                                                |
| 1100         | 1.94                                                     | 0.85±0.02                                                                    | 1.04±0.01                                                                    | 1.77±0.01                                                                    | 1.38±0.01                                                                    | 5.49±0.01                                                                |
| 1300         | 2.00                                                     | 1.1±0.01                                                                     | 1.26±0.01                                                                    | 2.1±0.01                                                                     | 2.04±0.02                                                                    | 7.45±0.01                                                                |
| 1500         | 2.05                                                     | 1.29±0.01                                                                    | 1.36±0.02                                                                    | 3.26±0.01                                                                    | 2.69±0.01                                                                    | 9.36±0.01                                                                |
| 1700         | 2.09                                                     | 1.77±0.02                                                                    | 1.75±0.01                                                                    | 4.66±0.01                                                                    | 3.89±0.01                                                                    | 11.94±0.02                                                               |
| 1900         | 2.11                                                     | 2.46±0.01                                                                    | 2.85±0.01                                                                    | 4.96±0.02                                                                    | 4.58±0.02                                                                    | 13.51±0.01                                                               |
